# Supplementary material
Source: publisher site journal article supplement (https://www.dovepress.com/article/255644)
Supplement: Supplementary file 1 [file get_supplementary_file.php]

Supplementary Figure 1

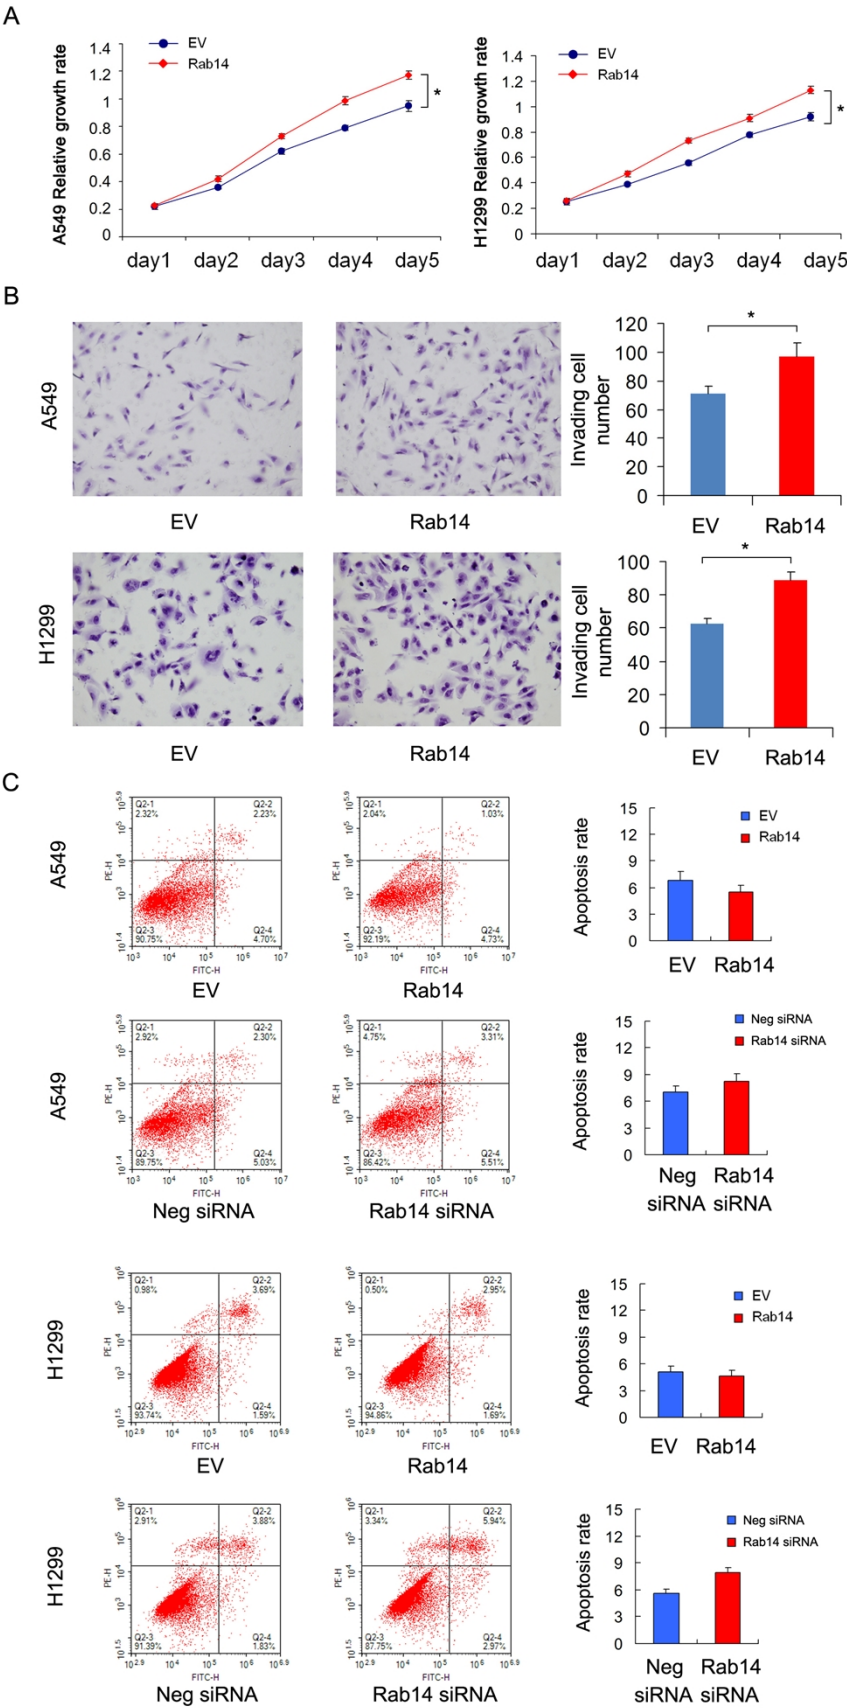

### Supplementary Figure 1

A. MTT results showed that Rab14 transfection increased proliferation rate in A549 and H1299 cells. B. Transwell assay showed that Rab14 overexpression increased the numbers of invading cells in A549 and H1299 cells. C, Rab14 overexpression did not change apoptosis. Rab14 depletion slightly increased apoptosis rate in A549 and H1299 cell line. \* $p < 0.05$ .

### Supplementary Figure 2

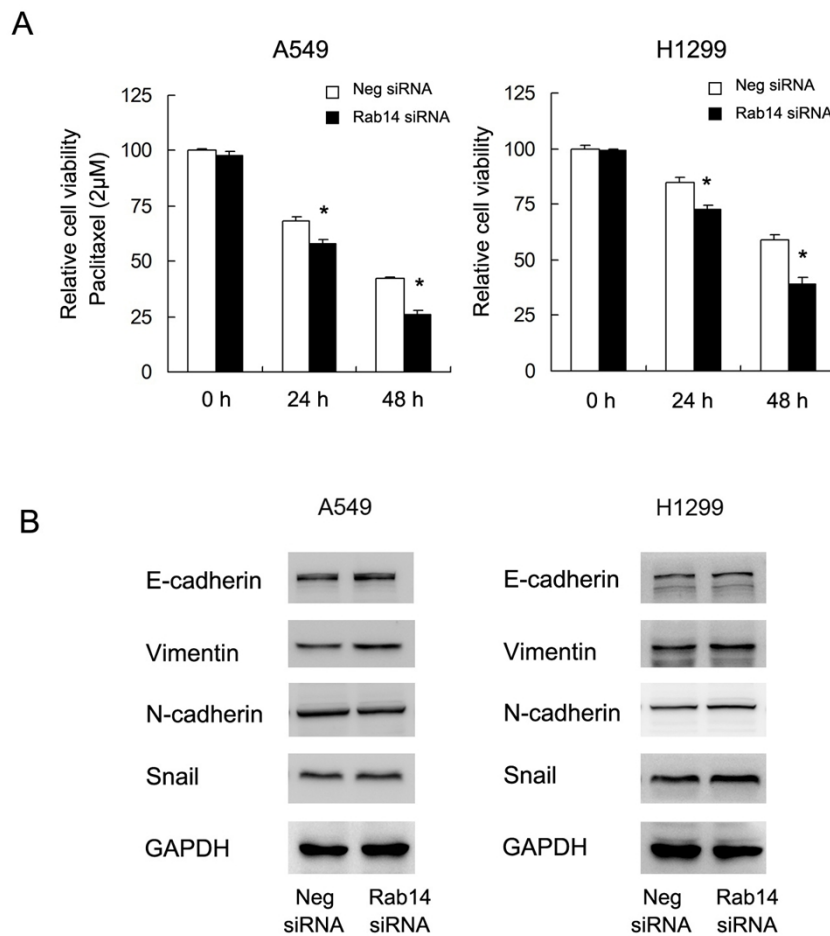

### Supplementary Figure 2

A. MTT showed that Rab14 depletion increased inhibition rate in both A549 and H1299 cells treated with 2µM concentration of paclitaxel. B. Rab14 depletion did not change the protein levels of E-cadherin, N-cadherin, Vimentin, and Snail in A549 and H1299 cell lines. \* $p < 0.05$ .

Supplementary Figure 3

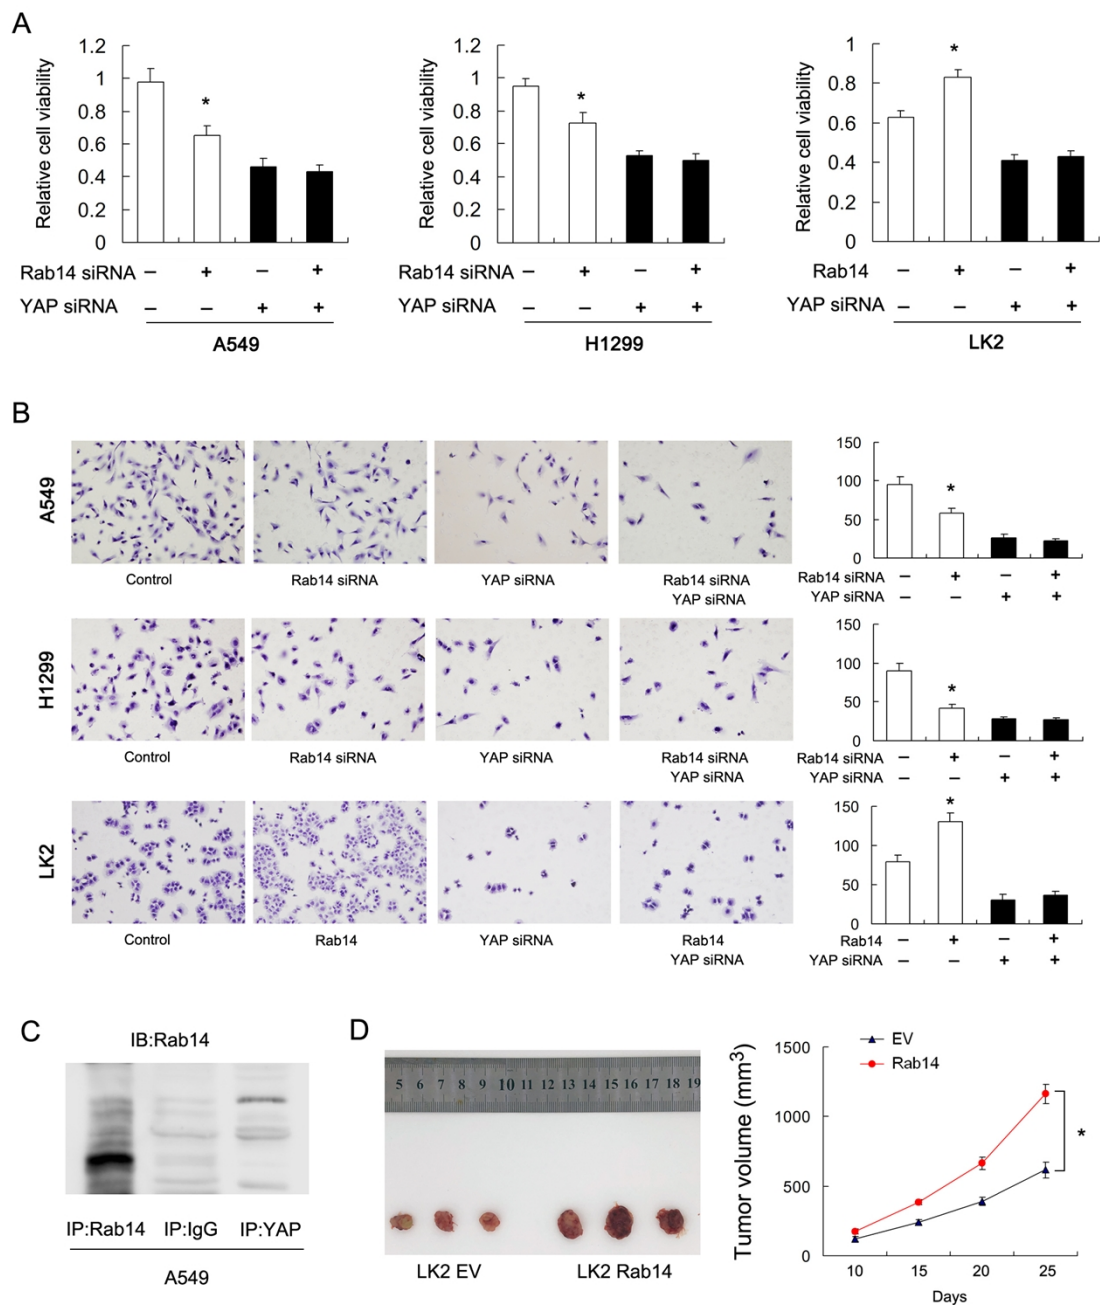

Supplementary Figure 3

A. MTT showed that YAP siRNA reduced cell proliferation and abolished the promoting effect of Rab14 on NSCLC proliferation. B. Transwell assay showed that YAP siRNA reduced cell invasion and abolished the promoting effect of Rab14 on invading ability. C. Co-immunoprecipitation of YAP and Rab14 followed by western

blot showed that there is no obvious interaction between YAP and Rab14. D. LK2 cells were stably transfected with Rab14 plasmid. Cells were injected into nude mice. Tumor growth and volume of xenografts were significantly increased when injected with cells with Rab14 overexpression. \*  $p < 0.05$

Supplementary Table 1. Distribution of Rab14 status in adenocarcinoma according to clinicopathological characteristics.

| Characteristics  | Number of patients | Rab14 low expression | Rab14 high expression | <i>P</i> |
|------------------|--------------------|----------------------|-----------------------|----------|
| Age              |                    |                      |                       |          |
| <60              | 35                 | 13                   | 22                    | 0.2468   |
| ≥60              | 27                 | 14                   | 13                    |          |
| Gender           |                    |                      |                       |          |
| Male             | 33                 | 16                   | 17                    | 0.4030   |
| Female           | 29                 | 11                   | 18                    |          |
| Differentiation  |                    |                      |                       |          |
| Well             | 30                 | 17                   | 13                    | 0.0437   |
| Moderate- Poor   | 32                 | 10                   | 22                    |          |
| TNM stage        |                    |                      |                       |          |
| I                | 24                 | 14                   | 10                    | 0.0620   |
| II III           | 38                 | 10                   | 25                    |          |
| Tumor status     |                    |                      |                       |          |
| T1               | 26                 | 11                   | 15                    | 0.8670   |
| T2-T4            | 36                 | 16                   | 20                    |          |
| Nodal metastasis |                    |                      |                       |          |
| Negative         | 29                 | 17                   | 12                    | 0.0248   |
| Positive         | 33                 | 11                   | 23                    |          |

Supplementary Table 2. Distribution of Rab14 status in squamous cell carcinoma according to clinicopathological characteristics.

| Characteristics  | Number of patients | Rab14 low expression | Rab14 high expression | <i>P</i> |
|------------------|--------------------|----------------------|-----------------------|----------|
| Age              |                    |                      |                       |          |
| <60              | 33                 | 16                   | 17                    | 0.3370   |
| ≥60              | 20                 | 7                    | 13                    |          |
| Gender           |                    |                      |                       |          |
| Male             | 42                 | 20                   | 22                    | 0.2255   |
| Female           | 11                 | 3                    | 8                     |          |
| Differentiation  |                    |                      |                       |          |
| Well             | 8                  | 3                    | 5                     | 0.7150   |
| Moderate- Poor   | 45                 | 20                   | 25                    |          |
| TNM stage        |                    |                      |                       |          |
| I                | 19                 | 12                   | 7                     | 0.030    |
| II III           | 34                 | 11                   | 23                    |          |
| Tumor status     |                    |                      |                       |          |
| T1               | 9                  | 1                    | 8                     | 0.0320   |
| T2-T4            | 44                 | 22                   | 22                    |          |
| Nodal metastasis |                    |                      |                       |          |
| Negative         | 27                 | 14                   | 13                    | 0.2056   |
| Positive         | 26                 | 9                    | 17                    |          |
